# Supplementary material
Source: publisher figshare collection journal article supplement (https://acs.figshare.com/ndownloader/files/5886090)
Supplement: Supplementary file 1 [file 5886090]

# om030055k.cif

data_iw003m_scott "Chiral titanium bis(aminopyridinates)..." OM030055K
  
_audit_creation_method            SHELXL-97 
_chemical_name_systematic 
; 
 ? 
; 
_chemical_name_common             ? 
_chemical_melting_point           ? 
_chemical_formula_moiety          ? 
_chemical_formula_sum 
 'C32 H30 Cl2 N4 Ti' 
_chemical_formula_weight          589.40 
  
loop_ 
 _atom_type_symbol 
 _atom_type_description 
 _atom_type_scat_dispersion_real 
 _atom_type_scat_dispersion_imag 
 _atom_type_scat_source 
 'C'  'C'   0.0033   0.0016 
 'International Tables Vol C Tables 4.2.6.8 and 6.1.1.4' 
 'H'  'H'   0.0000   0.0000 
 'International Tables Vol C Tables 4.2.6.8 and 6.1.1.4' 
 'N'  'N'   0.0061   0.0033 
 'International Tables Vol C Tables 4.2.6.8 and 6.1.1.4' 
 'Cl'  'Cl'   0.1484   0.1585 
 'International Tables Vol C Tables 4.2.6.8 and 6.1.1.4' 
 'Ti'  'Ti'   0.2776   0.4457 
 'International Tables Vol C Tables 4.2.6.8 and 6.1.1.4' 
  
_symmetry_cell_setting            Orthorhombic 
_symmetry_space_group_name_H-M    Pbca 
  
loop_ 
 _symmetry_equiv_pos_as_xyz 
 'x, y, z' 
 '-x+1/2, -y, z+1/2' 
 '-x, y+1/2, -z+1/2' 
 'x+1/2, -y+1/2, -z' 
 '-x, -y, -z' 
 'x-1/2, y, -z-1/2' 
 'x, -y-1/2, z-1/2' 
 '-x-1/2, y-1/2, z' 
  
_cell_length_a                    15.5864(7) 
_cell_length_b                    16.2149(7) 
_cell_length_c                    23.5128(11) 
_cell_angle_alpha                 90.00 
_cell_angle_beta                  90.00 
_cell_angle_gamma                 90.00 
_cell_volume                      5942.4(5) 
_cell_formula_units_Z             8 
_cell_measurement_temperature     180(2) 
_cell_measurement_reflns_used     7559 
_cell_measurement_theta_min       1.73 
_cell_measurement_theta_max       22.50 
  
_exptl_crystal_description        Block 
_exptl_crystal_colour             Purple 
_exptl_crystal_size_max           0.25 
_exptl_crystal_size_mid           0.14 
_exptl_crystal_size_min           0.12 
_exptl_crystal_density_meas       ? 
_exptl_crystal_density_diffrn     1.318 
_exptl_crystal_density_method     'not measured' 
_exptl_crystal_F_000              2448 
_exptl_absorpt_coefficient_mu     0.496 
_exptl_absorpt_correction_type    SADABS 
_exptl_absorpt_correction_T_min   0.803088 
_exptl_absorpt_correction_T_max   0.927998 
_exptl_absorpt_process_details    'SADABS (Sheldrick, 1996)' 
  
_exptl_special_details 
; 
  The temperature of the crystal was controlled using the Oxford Cryosystem 
Cryostream Cooler (Cosier & Glazer, 1986). 
The data collection nominally covered over a hemisphere of reciprocal 
space, by a combination of three sets of exposures with 
different \f angles for the crystal; each 10 s exposure covered 0.3\% in \w. 
The crystal-to-detector distance was 5.0 cm.  Coverage of the unique set 
is over 97% complete to at least 26\% in \q. 
Crystal decay was found to be negligible by by repeating the initial frames at t 
data collection and analyzing the duplicate reflections. 
  
Hydrogen atoms were added at calculated positions and refined using a 
riding model.  Anisotropic displacement parameters were used for all non-H atoms 
H-atoms were given isotropic displacement parameter equal to 1.2 (or 1.5 for met 
atoms) times the equivalent isotropic displacement parameter of the atom 
to which they are attached. 
; 
  
_diffrn_ambient_temperature       180(2) 
_diffrn_radiation_wavelength      0.71073 
_diffrn_radiation_type            MoK\a 
_diffrn_radiation_source          'fine-focus sealed tube' 
_diffrn_radiation_monochromator   graphite 
_diffrn_measurement_device_type   'Siemens SMART diffractometer' 
_diffrn_measurement_method        '\w scans' 
_diffrn_detector_area_resol_mean  8.192 
_diffrn_standards_number          ? 
_diffrn_standards_interval_count  ? 
_diffrn_standards_interval_time   ? 
_diffrn_standards_decay_%         nil 
_diffrn_reflns_number             23213 
_diffrn_reflns_av_R_equivalents   0.0805 
_diffrn_reflns_av_sigmaI/netI     0.0430 
_diffrn_reflns_limit_h_min        -16 
_diffrn_reflns_limit_h_max        16 
_diffrn_reflns_limit_k_min        -17 
_diffrn_reflns_limit_k_max        12 
_diffrn_reflns_limit_l_min        -25 
_diffrn_reflns_limit_l_max        25 
_diffrn_reflns_theta_min          1.73 
_diffrn_reflns_theta_max          22.50 
_reflns_number_total              3872 
_reflns_number_gt                 2708 
_reflns_threshold_expression      >2sigma(I) 
  
_computing_data_collection        'SMART (Siemens, 1994)' 
_computing_cell_refinement        'SAINT (Siemens, 1995)' 
_computing_data_reduction         'SAINT (Siemens, 1995)' 
_computing_structure_solution     'SHELXS-97 (Sheldrick, 1990)' 
_computing_structure_refinement   'SHELXL-97 (Sheldrick, 1997)' 
_computing_molecular_graphics     'SHELXTL (Sheldrick, 1997)' 
_computing_publication_material   'SHELXTL (Sheldrick, 1997)' 
  
_refine_special_details 
; 
 Refinement of F^2^ against ALL reflections.  The weighted R-factor wR and 
 goodness of fit S are based on F^2^, conventional R-factors R are based 
 on F, with F set to zero for negative F^2^. The threshold expression of 
 F^2^ > 2sigma(F^2^) is used only for calculating R-factors(gt) etc. and is 
 not relevant to the choice of reflections for refinement.  R-factors based 
 on F^2^ are statistically about twice as large as those based on F, and R- 
 factors based on ALL data will be even larger. 
; 
  
_refine_ls_structure_factor_coef  Fsqd 
_refine_ls_matrix_type            full 
_refine_ls_weighting_scheme       calc 
_refine_ls_weighting_details 
 'calc w=1/[\s^2^(Fo^2^)+(0.0395P)^2^+14.9326P] where P=(Fo^2^+2Fc^2^)/3' 
_atom_sites_solution_primary      direct 
_atom_sites_solution_secondary    difmap 
_atom_sites_solution_hydrogens    geom 
_refine_ls_hydrogen_treatment     mixed 
_refine_ls_extinction_method      none 
_refine_ls_extinction_coef        ? 
_refine_ls_number_reflns          3872 
_refine_ls_number_parameters      356 
_refine_ls_number_restraints      0 
_refine_ls_R_factor_all           0.0915 
_refine_ls_R_factor_gt            0.0560 
_refine_ls_wR_factor_ref          0.1320 
_refine_ls_wR_factor_gt           0.1121 
_refine_ls_goodness_of_fit_ref    1.078 
_refine_ls_restrained_S_all       1.078 
_refine_ls_shift/su_max           0.001 
_refine_ls_shift/su_mean          0.000 
  
loop_ 
 _atom_site_label 
 _atom_site_type_symbol 
 _atom_site_fract_x 
 _atom_site_fract_y 
 _atom_site_fract_z 
 _atom_site_U_iso_or_equiv 
 _atom_site_adp_type 
 _atom_site_occupancy 
 _atom_site_symmetry_multiplicity 
 _atom_site_calc_flag 
 _atom_site_refinement_flags 
 _atom_site_disorder_assembly 
 _atom_site_disorder_group 
Ti1 Ti 0.93212(5) 0.24685(5) 0.72618(3) 0.0279(2) Uani 1 1 d . . . 
Cl1 Cl 0.89209(8) 0.36465(8) 0.68034(6) 0.0472(4) Uani 1 1 d . . . 
Cl2 Cl 0.97643(8) 0.13234(8) 0.67787(6) 0.0474(4) Uani 1 1 d . . . 
N1 N 0.9919(2) 0.2985(2) 0.79116(15) 0.0278(9) Uani 1 1 d . . . 
N2 N 1.0678(2) 0.2934(2) 0.71296(16) 0.0324(10) Uani 1 1 d . . . 
N3 N 0.8704(2) 0.1898(2) 0.78866(15) 0.0289(9) Uani 1 1 d . . . 
N4 N 0.7973(2) 0.2024(2) 0.70992(15) 0.0297(10) Uani 1 1 d . . . 
C1 C 0.8324(3) 0.2773(3) 0.9747(2) 0.0483(15) Uani 1 1 d . . . 
H1A H 0.7746 0.2987 0.9820 0.072 Uiso 1 1 calc R . . 
H1B H 0.8673 0.2831 1.0092 0.072 Uiso 1 1 calc R . . 
H1C H 0.8288 0.2189 0.9642 0.072 Uiso 1 1 calc R . . 
C2 C 0.8732(3) 0.3255(3) 0.92669(19) 0.0321(12) Uani 1 1 d . . . 
C3 C 0.8604(3) 0.4106(3) 0.9256(2) 0.0363(13) Uani 1 1 d . . . 
H3A H 0.8277 0.4361 0.9548 0.044 Uiso 1 1 calc R . . 
C4 C 0.8948(3) 0.4581(3) 0.8826(2) 0.0372(13) Uani 1 1 d . . . 
H4A H 0.8873 0.5162 0.8832 0.045 Uiso 1 1 calc R . . 
C5 C 0.9399(3) 0.4217(3) 0.83879(19) 0.0302(12) Uani 1 1 d . . . 
H5A H 0.9622 0.4545 0.8087 0.036 Uiso 1 1 calc R . . 
C6 C 0.9524(3) 0.3367(3) 0.83893(18) 0.0252(11) Uani 1 1 d . . . 
C7 C 0.9207(3) 0.2874(3) 0.88338(19) 0.0279(11) Uani 1 1 d . . . 
C8 C 0.9370(3) 0.1961(3) 0.88258(18) 0.0267(11) Uani 1 1 d . . . 
C9 C 0.9068(3) 0.1490(3) 0.83637(19) 0.0294(12) Uani 1 1 d . . . 
C10 C 0.9170(3) 0.0633(3) 0.8356(2) 0.0363(13) Uani 1 1 d . . . 
H10A H 0.8952 0.0320 0.8047 0.044 Uiso 1 1 calc R . . 
C11 C 0.9587(3) 0.0243(3) 0.8799(2) 0.0441(14) Uani 1 1 d . . . 
H11A H 0.9648 -0.0340 0.8798 0.053 Uiso 1 1 calc R . . 
C12 C 0.9915(3) 0.0701(3) 0.9242(2) 0.0409(14) Uani 1 1 d . . . 
H12A H 1.0213 0.0429 0.9540 0.049 Uiso 1 1 calc R . . 
C13 C 0.9819(3) 0.1554(3) 0.92611(19) 0.0349(12) Uani 1 1 d . . . 
C14 C 1.0243(4) 0.2014(3) 0.9747(2) 0.0506(15) Uani 1 1 d . . . 
H14A H 1.0814 0.1781 0.9818 0.076 Uiso 1 1 calc R . . 
H14B H 0.9892 0.1960 1.0091 0.076 Uiso 1 1 calc R . . 
H14C H 1.0299 0.2599 0.9647 0.076 Uiso 1 1 calc R . . 
C15 C 1.0651(3) 0.3278(3) 0.76518(18) 0.0259(11) Uani 1 1 d . . . 
C16 C 1.1286(3) 0.3804(3) 0.7853(2) 0.0337(12) Uani 1 1 d . . . 
H16A H 1.1251 0.4051 0.8219 0.040 Uiso 1 1 calc R . . 
C17 C 1.1976(3) 0.3948(3) 0.7492(2) 0.0415(14) Uani 1 1 d . . . 
H17A H 1.2430 0.4298 0.7612 0.050 Uiso 1 1 calc R . . 
C18 C 1.2006(3) 0.3586(3) 0.6961(2) 0.0463(15) Uani 1 1 d . . . 
H18A H 1.2483 0.3684 0.6718 0.056 Uiso 1 1 calc R . . 
C19 C 1.1341(3) 0.3081(3) 0.6780(2) 0.0388(13) Uani 1 1 d . . . 
C20 C 1.1322(4) 0.2684(4) 0.6204(2) 0.0610(18) Uani 1 1 d . . . 
H20A H 1.0780 0.2819 0.6014 0.091 Uiso 1 1 calc R . . 
H20B H 1.1368 0.2084 0.6247 0.091 Uiso 1 1 calc R . . 
H20C H 1.1803 0.2887 0.5976 0.091 Uiso 1 1 calc R . . 
C21 C 0.7975(3) 0.1632(3) 0.76076(19) 0.0276(11) Uani 1 1 d . . . 
C22 C 0.7329(3) 0.1099(3) 0.7772(2) 0.0357(12) Uani 1 1 d . . . 
H22A H 0.7350 0.0815 0.8125 0.043 Uiso 1 1 calc R . . 
C23 C 0.6651(3) 0.0999(3) 0.7401(2) 0.0434(14) Uani 1 1 d . . . 
H23A H 0.6193 0.0639 0.7499 0.052 Uiso 1 1 calc R . . 
C24 C 0.6629(3) 0.1414(3) 0.6889(2) 0.0417(14) Uani 1 1 d . . . 
H24A H 0.6153 0.1349 0.6640 0.050 Uiso 1 1 calc R . . 
C25 C 0.7306(3) 0.1929(3) 0.6739(2) 0.0372(13) Uani 1 1 d . . . 
C26 C 0.7341(4) 0.2386(4) 0.6185(2) 0.0553(16) Uani 1 1 d . . . 
H26A H 0.7415 0.2977 0.6259 0.083 Uiso 1 1 calc R . . 
H26B H 0.6805 0.2298 0.5976 0.083 Uiso 1 1 calc R . . 
H26C H 0.7825 0.2183 0.5959 0.083 Uiso 1 1 calc R . . 
C100 C 0.1887(7) 0.0962(4) 0.4985(4) 0.114(4) Uani 1 1 d . . . 
H100 H 0.1888 0.1352 0.5287 0.136 Uiso 1 1 calc R . . 
C101 C 0.2674(5) 0.0623(5) 0.4748(4) 0.100(3) Uani 1 1 d . . . 
H10D H 0.3218 0.0784 0.4892 0.120 Uiso 1 1 calc R . . 
C102 C 0.2609(5) 0.0068(4) 0.4315(3) 0.0679(19) Uani 1 1 d . . . 
H10E H 0.3116 -0.0145 0.4146 0.081 Uiso 1 1 calc R . . 
C103 C 0.1845(5) -0.0184(5) 0.4122(3) 0.078(2) Uani 1 1 d . . . 
H10F H 0.1824 -0.0575 0.3822 0.093 Uiso 1 1 calc R . . 
C104 C 0.1123(6) 0.0094(5) 0.4337(3) 0.089(2) Uani 1 1 d . . . 
H10G H 0.0594 -0.0123 0.4202 0.107 Uiso 1 1 calc R . . 
C105 C 0.1115(5) 0.0669(4) 0.4735(4) 0.078(2) Uani 1 1 d . . . 
H10H H 0.0581 0.0891 0.4857 0.094 Uiso 1 1 calc R . . 
  
loop_ 
 _atom_site_aniso_label 
 _atom_site_aniso_U_11 
 _atom_site_aniso_U_22 
 _atom_site_aniso_U_33 
 _atom_site_aniso_U_23 
 _atom_site_aniso_U_13 
 _atom_site_aniso_U_12 
Ti1 0.0334(5) 0.0276(5) 0.0227(4) -0.0010(4) 0.0012(4) 0.0003(4) 
Cl1 0.0367(8) 0.0462(9) 0.0586(9) 0.0226(7) 0.0036(7) 0.0034(6) 
Cl2 0.0407(8) 0.0467(9) 0.0547(9) -0.0239(7) -0.0058(7) 0.0092(7) 
N1 0.032(2) 0.025(2) 0.027(2) -0.0015(17) 0.0048(18) -0.0063(18) 
N2 0.034(2) 0.035(2) 0.029(2) 0.0054(19) 0.004(2) 0.0039(19) 
N3 0.036(2) 0.025(2) 0.025(2) 0.0009(18) -0.0034(18) -0.0080(18) 
N4 0.030(2) 0.030(2) 0.029(2) -0.0065(18) 0.0004(19) 0.0027(19) 
C1 0.051(4) 0.059(4) 0.034(3) 0.005(3) 0.012(3) -0.007(3) 
C2 0.030(3) 0.039(3) 0.027(3) -0.004(2) -0.001(2) -0.004(2) 
C3 0.042(3) 0.037(3) 0.030(3) -0.011(2) 0.001(2) 0.001(3) 
C4 0.043(3) 0.030(3) 0.039(3) -0.009(2) -0.004(3) 0.004(3) 
C5 0.037(3) 0.023(3) 0.030(3) 0.003(2) -0.005(2) -0.004(2) 
C6 0.023(3) 0.029(3) 0.024(3) -0.001(2) 0.000(2) -0.008(2) 
C7 0.030(3) 0.030(3) 0.023(3) 0.001(2) -0.003(2) -0.009(2) 
C8 0.027(3) 0.028(3) 0.024(3) 0.006(2) 0.003(2) -0.005(2) 
C9 0.035(3) 0.025(3) 0.028(3) 0.005(2) 0.003(2) -0.008(2) 
C10 0.040(3) 0.025(3) 0.043(3) -0.001(2) -0.002(3) -0.009(2) 
C11 0.044(3) 0.032(3) 0.056(4) 0.007(3) 0.006(3) 0.000(3) 
C12 0.042(3) 0.036(3) 0.045(3) 0.017(3) -0.002(3) 0.003(3) 
C13 0.040(3) 0.039(3) 0.025(3) 0.007(2) 0.001(2) -0.006(3) 
C14 0.053(4) 0.062(4) 0.037(3) 0.005(3) -0.011(3) -0.004(3) 
C15 0.026(3) 0.021(3) 0.030(3) 0.008(2) 0.001(2) 0.005(2) 
C16 0.034(3) 0.023(3) 0.043(3) 0.010(2) -0.005(2) 0.000(2) 
C17 0.029(3) 0.037(3) 0.058(4) 0.020(3) -0.004(3) -0.005(3) 
C18 0.028(3) 0.057(4) 0.054(4) 0.029(3) 0.009(3) 0.007(3) 
C19 0.034(3) 0.045(3) 0.037(3) 0.008(3) 0.005(3) 0.010(3) 
C20 0.056(4) 0.087(5) 0.040(3) -0.001(3) 0.016(3) 0.011(4) 
C21 0.030(3) 0.023(3) 0.030(3) -0.004(2) 0.002(2) 0.000(2) 
C22 0.038(3) 0.035(3) 0.034(3) -0.001(2) 0.006(3) -0.006(3) 
C23 0.030(3) 0.036(3) 0.064(4) -0.015(3) 0.009(3) 0.000(2) 
C24 0.025(3) 0.052(4) 0.048(4) -0.019(3) -0.006(3) 0.007(3) 
C25 0.036(3) 0.039(3) 0.037(3) -0.011(3) -0.007(3) 0.017(3) 
C26 0.057(4) 0.077(4) 0.031(3) -0.007(3) -0.008(3) 0.015(3) 
C100 0.196(10) 0.023(4) 0.122(7) -0.027(4) 0.074(7) -0.045(5) 
C101 0.089(6) 0.077(5) 0.134(7) -0.032(5) 0.036(6) -0.052(5) 
C102 0.057(5) 0.057(4) 0.090(5) -0.012(4) 0.020(4) 0.004(4) 
C103 0.068(5) 0.103(6) 0.063(5) 0.015(4) 0.006(4) 0.016(5) 
C104 0.100(7) 0.099(7) 0.068(5) 0.025(5) -0.019(5) 0.036(5) 
C105 0.084(6) 0.032(4) 0.118(7) 0.038(4) 0.042(5) 0.021(4) 
  
_geom_special_details 
; 
 All esds (except the esd in the dihedral angle between two l.s. planes) 
 are estimated using the full covariance matrix.  The cell esds are taken 
 into account individually in the estimation of esds in distances, angles 
 and torsion angles; correlations between esds in cell parameters are only 
 used when they are defined by crystal symmetry.  An approximate (isotropic) 
 treatment of cell esds is used for estimating esds involving l.s. planes. 
; 
  
loop_ 
 _geom_bond_atom_site_label_1 
 _geom_bond_atom_site_label_2 
 _geom_bond_distance 
 _geom_bond_site_symmetry_2 
 _geom_bond_publ_flag 
Ti1 N1 1.975(4) . y 
Ti1 N3 1.985(4) . y 
Ti1 N4 2.254(4) . y 
Ti1 N2 2.267(4) . y 
Ti1 Cl1 2.2803(15) . y 
Ti1 Cl2 2.2835(15) . y 
Ti1 C15 2.620(5) . ? 
Ti1 C21 2.628(5) . ? 
N1 C15 1.380(5) . y 
N1 C6 1.423(5) . ? 
N2 C19 1.342(6) . ? 
N2 C15 1.349(6) . y 
N3 C21 1.381(6) . y 
N3 C9 1.421(6) . ? 
N4 C25 1.349(6) . ? 
N4 C21 1.354(5) . y 
C1 C2 1.514(6) . ? 
C2 C3 1.394(7) . ? 
C2 C7 1.402(6) . ? 
C3 C4 1.378(7) . ? 
C4 C5 1.380(6) . ? 
C5 C6 1.392(6) . ? 
C6 C7 1.407(6) . ? 
C7 C8 1.502(6) . ? 
C8 C13 1.405(6) . ? 
C8 C9 1.409(6) . ? 
C9 C10 1.399(6) . ? 
C10 C11 1.381(7) . ? 
C11 C12 1.377(7) . ? 
C12 C13 1.392(7) . ? 
C13 C14 1.517(7) . ? 
C15 C16 1.389(6) . ? 
C16 C17 1.390(7) . ? 
C17 C18 1.381(7) . ? 
C18 C19 1.387(7) . ? 
C19 C20 1.499(7) . ? 
C21 C22 1.382(6) . ? 
C22 C23 1.381(7) . ? 
C23 C24 1.379(7) . ? 
C24 C25 1.392(7) . ? 
C25 C26 1.500(7) . ? 
C100 C105 1.421(11) . ? 
C100 C101 1.455(11) . ? 
C101 C102 1.364(9) . ? 
C102 C103 1.337(9) . ? 
C103 C104 1.313(9) . ? 
C104 C105 1.321(10) . ? 
  
loop_ 
 _geom_angle_atom_site_label_1 
 _geom_angle_atom_site_label_2 
 _geom_angle_atom_site_label_3 
 _geom_angle 
 _geom_angle_site_symmetry_1 
 _geom_angle_site_symmetry_3 
 _geom_angle_publ_flag 
N1 Ti1 N3 81.57(14) . . y 
N1 Ti1 N4 134.93(14) . . y 
N3 Ti1 N4 61.61(14) . . y 
N1 Ti1 N2 61.65(14) . . y 
N3 Ti1 N2 135.14(15) . . y 
N4 Ti1 N2 162.34(13) . . y 
N1 Ti1 Cl1 98.03(12) . . y 
N3 Ti1 Cl1 127.41(12) . . y 
N4 Ti1 Cl1 86.15(11) . . y 
N2 Ti1 Cl1 84.92(10) . . y 
N1 Ti1 Cl2 125.92(12) . . y 
N3 Ti1 Cl2 97.81(12) . . y 
N4 Ti1 Cl2 86.40(10) . . y 
N2 Ti1 Cl2 85.44(11) . . y 
Cl1 Ti1 Cl2 121.92(6) . . y 
N1 Ti1 C15 31.11(14) . . ? 
N3 Ti1 C15 110.98(14) . . ? 
N4 Ti1 C15 163.21(13) . . ? 
N2 Ti1 C15 31.00(13) . . ? 
Cl1 Ti1 C15 87.83(10) . . ? 
Cl2 Ti1 C15 110.02(11) . . ? 
N1 Ti1 C21 110.84(14) . . ? 
N3 Ti1 C21 31.05(14) . . ? 
N4 Ti1 C21 31.01(13) . . ? 
N2 Ti1 C21 163.61(14) . . ? 
Cl1 Ti1 C21 111.11(11) . . ? 
Cl2 Ti1 C21 88.61(10) . . ? 
C15 Ti1 C21 141.48(13) . . ? 
C15 N1 C6 123.8(4) . . ? 
C15 N1 Ti1 101.2(3) . . ? 
C6 N1 Ti1 126.3(3) . . ? 
C19 N2 C15 120.6(4) . . ? 
C19 N2 Ti1 149.5(3) . . ? 
C15 N2 Ti1 89.1(3) . . ? 
C21 N3 C9 123.9(4) . . ? 
C21 N3 Ti1 101.1(3) . . ? 
C9 N3 Ti1 127.4(3) . . ? 
C25 N4 C21 120.1(4) . . ? 
C25 N4 Ti1 149.4(3) . . ? 
C21 N4 Ti1 89.9(3) . . ? 
C3 C2 C7 119.8(4) . . ? 
C3 C2 C1 117.7(4) . . ? 
C7 C2 C1 122.4(5) . . ? 
C4 C3 C2 120.8(5) . . ? 
C3 C4 C5 120.4(5) . . ? 
C4 C5 C6 119.5(5) . . ? 
C5 C6 C7 121.1(4) . . ? 
C5 C6 N1 119.4(4) . . ? 
C7 C6 N1 119.4(4) . . ? 
C2 C7 C6 118.3(4) . . ? 
C2 C7 C8 122.2(4) . . ? 
C6 C7 C8 119.5(4) . . ? 
C13 C8 C9 118.3(4) . . ? 
C13 C8 C7 122.6(4) . . ? 
C9 C8 C7 119.1(4) . . ? 
C10 C9 C8 120.7(4) . . ? 
C10 C9 N3 119.9(4) . . ? 
C8 C9 N3 119.4(4) . . ? 
C11 C10 C9 119.9(5) . . ? 
C12 C11 C10 119.8(5) . . ? 
C11 C12 C13 121.4(5) . . ? 
C12 C13 C8 119.8(5) . . ? 
C12 C13 C14 117.8(5) . . ? 
C8 C13 C14 122.3(5) . . ? 
N2 C15 N1 106.6(4) . . y 
N2 C15 C16 122.8(4) . . ? 
N1 C15 C16 130.6(4) . . ? 
N2 C15 Ti1 59.9(2) . . ? 
N1 C15 Ti1 47.7(2) . . ? 
C16 C15 Ti1 172.1(3) . . ? 
C15 C16 C17 116.5(5) . . ? 
C18 C17 C16 120.5(5) . . ? 
C17 C18 C19 120.2(5) . . ? 
N2 C19 C18 119.5(5) . . ? 
N2 C19 C20 117.5(5) . . ? 
C18 C19 C20 123.1(5) . . ? 
N4 C21 N3 105.9(4) . . y 
N4 C21 C22 122.7(4) . . ? 
N3 C21 C22 131.4(4) . . ? 
N4 C21 Ti1 59.1(2) . . ? 
N3 C21 Ti1 47.8(2) . . ? 
C22 C21 Ti1 172.4(3) . . ? 
C23 C22 C21 117.0(5) . . ? 
C24 C23 C22 120.8(5) . . ? 
C23 C24 C25 119.7(5) . . ? 
N4 C25 C24 119.6(5) . . ? 
N4 C25 C26 117.4(5) . . ? 
C24 C25 C26 123.0(5) . . ? 
C105 C100 C101 115.4(7) . . ? 
C102 C101 C100 118.2(7) . . ? 
C103 C102 C101 121.3(7) . . ? 
C104 C103 C102 122.0(8) . . ? 
C103 C104 C105 121.5(9) . . ? 
C104 C105 C100 121.4(7) . . ? 
  
_diffrn_measured_fraction_theta_max    0.997 
_diffrn_reflns_theta_full              22.50 
_diffrn_measured_fraction_theta_full   0.997 
_refine_diff_density_max    0.486 
_refine_diff_density_min   -0.345 
_refine_diff_density_rms    0.063 

#===END
